# Supplementary material for: Transcriptomic investigation of wound healing and regeneration in the cnidarian Calliactis polypus
Source: PubMed Central journal article supplement (PMC5288695; doi:10.1038/srep41458), 2017-02-02
Supplement: srep41458-s1.pdf [file srep41458-s1.pdf]

# **Transcriptomic investigation of wound healing and regeneration in the cnidarian *Calliactis polypus***

**Zachary K. Stewart<sup>1\*</sup>, Ana Pavasovic<sup>2,3</sup>, Daniella H. Hock<sup>4</sup>, and Peter J. Prentis<sup>1,5</sup>**

<sup>1</sup>School of Earth, Environmental and Biological Sciences, Queensland University of Technology

<sup>2</sup>School of Biomedical Sciences, Queensland University of Technology

<sup>3</sup>Institute of Health and Biomedical Innovation, Queensland University of Technology

<sup>4</sup>Biological Sciences Centre, Federal University of Santa Catarina

<sup>5</sup>Institute for Future Environments, Queensland University of Technology

**\* Corresponding author**

Email: [zkstewart1@gmail.com](mailto:zkstewart1@gmail.com)

Address: Queensland University of Technology, GPO Box 2434, Brisbane, QLD 4001

# Supplementary Methods

## Python script description

'biopython\_orf\_find.py'

ORF = open reading frame

Refer to <https://github.com/zkstewart/orf-finder-py> to download the script.

## Dependencies

This script was designed to work with Python versions 3.4 and 3.5, and utilises the in-built 're' and 'os' packages, as well as the external '**Biopython**' package (<https://github.com/biopython/biopython.github.io/>). This script was built and tested on the Windows 10 OS, though there should be no reason why it cannot run on any OS that Python is capable of running on.

## Description of script logic

The custom Python script used in this study is the creation of Zachary K. Stewart. This script was designed to be used by those unfamiliar with command line operations. Thus, the starting section of the script has text prompts which specify to the user what commands are required at each point, with checks in place to ensure the user inputs the correct values. The order of this is to specify the name of the fasta file which contains the nucleotide sequences from which ORFs will be extracted, followed by the output file name which will contain the extracted ORFs, the minimum ORF length you wish to consider, the number of ORFs you wish to obtain which meet this length requirement, and two stringency values which will determine the weighting with which we will consider ORFs with non-canonical (i.e., TTG, GTG, CTG) or no-codon (i.e., fragmented sequence) starts as opposed to traditional (i.e., ATG) start sites. Before delving into the specifics of how these stringencies work, it should first be mentioned that this script works on the basis of identifying regions in-between stop codons. Thus, to this script, an ORF is a region uninterrupted by stop codons. Returning to the stringency values, these values have defaults which I recommend the script runs with, but if shorter peptides (such as those of 10-50AA length) which often have alternative starts are sought, then lowering the stringency of these default values manually is a valid option. No-codon starts are by default weighted against the most heavily, as the assumption with this is that the transcript being analysed is fragmentary and lacks its actual start site. This assumption should only be considered in the absence of any identifiable, putative ORFs with

start codons within the sequence, hence the heavy weighting. The two stringency values together help to define the ‘best’ ORF identified in a sequence according to its overall length. As such, while an alternative start may render a longer ORF than an ATG start, the stringency value will weight this so that a non-canonical start will only be accepted if it increases ORF length by a large (or user specified) margin. As such, this script works solely on the basis of ORF length, attempting to provide the longest ORF with the most sensible start codon.

### File in- and output

This script will read in fasta-formatted ‘.fa’ or ‘.fasta’ files containing nucleotide sequences. The output will be a fasta-formatted ‘.fasta’ file containing protein translations of ORFs identified. The original sequence identifiers will be modified in this output to contain the ORF number as determined from this script. For example, if an original nucleotide sequence is titled ‘>contig1’, depending on the number of ORFs identified in this sequence, the output file will have entries titled ‘>contig1\_ORF1’ and ‘>contig1\_ORF2’, etc.

### Additional notes

As the writer of this script is self-taught, this script may not necessarily conform with writing standards such as PEP8, which may reduce its readability. The script should be relatively light on CPU and RAM usage, and thus should be suitable for use on all types of computers. Unless the CPU of the computer running this script is very weak, this script should be capable of processing files with hundreds of thousands of sequences in time spans of less than 10 minutes (approximately), though depending on user settings (such as how small of a minimum ORF length you specify or how many ORFs you extract from each sequence) this time can vary to some degree. As this script regularly updates the user on the progress of the script, it can be roughly gauged how long the script should take to complete.

More complex ORF finders may often consider things such as GC content and the presence of Kozak consensus sequences among other features. Due to the ability to determine the strictness with which we consider alternative starts, the script is designed to be suitable for finding novel ORFs wherein assumptions of GC content and other sequence features may not hold. Additionally, as this script is capable of pulling many ORFs out of a sequence, it is also intended for performing analyses such as the one in this study, wherein multiple transcriptomes had potential ORFs extracted and compared via BLAST to identify conserved regions. Subsequently, as mentioned, this script is designed primarily with novel ORF identification in mind. If you intend to use this for yourself, you may want to consider what

your goals are, as this script is not necessarily designed to find the most biologically valid start codon of conserved genes, which typically demonstrate certain sequence features.

### Script usage in this study

In this study the transcriptomes of *Calliactis polypus* (originating from this study), as well as *Nemanthus annamensis*, *Telmatactis sp.*, *Anthopleura buddemeieri*, *Aulactinia veratra*, and *Actinia tenebrosa* had ORFs extracted using this script. Following the order of inputs detailed in ‘Description of script logic’, these species had their transcriptome fasta files read in, an output file name associated with this, a minimum ORF length of **33AA** specified, **5** ORFs extracted which meet this minimum length, and a modified stringency value of **34AA** length increase to accept an alternative start, and **69AA** length increase to accept a no-codon start (as opposed to the default **49AA** and **99AA**, respectively). It was decided to use less strict stringency values as the intention was to find potentially novel ORFs, which may not necessarily utilise a traditional start codon. Additionally, the fact that we did not find confident matches to the nr database might indicate fragmentation, hence the lower no-codon stringency. This was balanced against the assumption that even a novel ORF, if conserved between any of the sea anemone species assessed here, is still likely to have a traditional start as it will have been conserved over potentially long evolutionary times. The resulting output files of ORFs were then used in local BLAST analyses, the results of which are presented in Supplementary Data 1 (5. anemone\_orfs).

## Time point categorisation

The 489 differentially expressed transcripts were categorised as being up or downregulated at 3 hours post sectioning (hps), 20 hps, and 96 hps when compared to baseline. For most transcripts, baseline was taken to be expression in control (0 hps); as some of these transcripts were only found to differ statistically when compared to time points other than control, further assessment of these was performed to categorise these transcripts. This treatment was required for 83 transcripts. For these cases, we wished to see if it would be sensible to consider the expression levels of one of the treatment time points (i.e., 3 hps, 20 hps, or 96 hps) to represent baseline expression. The method by which we did this was to create scatterplots of each transcript's log<sub>2</sub>-transformed median-centred expression values to observe patterns in the data which would allow us to infer what the baseline level of expression was. The logic that went into this process is demonstrated by way of two examples below, with the complete list of scatterplots also attached to this document.

How to read figure: Each dot (three dots per time point) represents the log<sub>2</sub>-transformed median-centred expression value for one of the biological replicates. The black line joining each dot within a single time point highlights the range of values for each time point's replicates. The red line indicates the mean value of the biological replicate's expression values across the four time points. With relation to this analysis, gap regions where no time point's ranges (black lines) overlap are significant for indicating when a time point is differentially expressed.

**Example 1** (positive attribution of baseline status) - TR39823|c0\_g2\_i1:

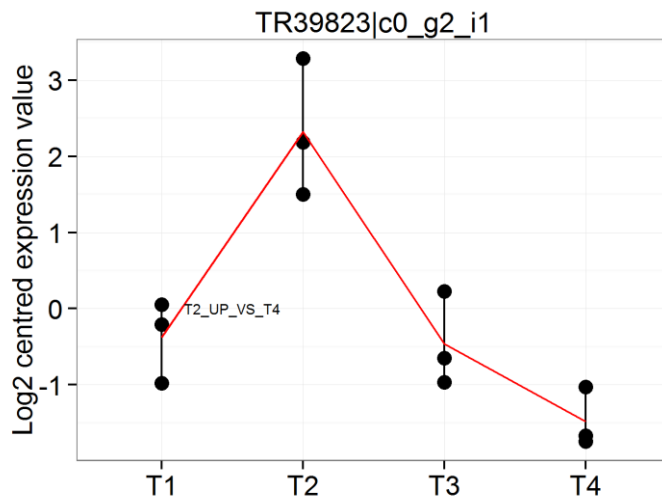

As indicated on this scatterplot, the only two time points that differ statistically are T2 (3 hps) and T4 (96 hps). This presents a problem, as physiological baseline expression of a transcript would be expected to be represented by T1 (0 hps, control). However, the scatterplot does demonstrate that there is an unambiguous and sharp rise in expression at T2 when compared to all three other time points (i.e., the range of values for T2 do not overlap with the other time points). Thus, we believe that we can suggest that this transcript's expression is **upregulated** at T2, with the relative expression indicated at T4 being considered to be **baseline** as it overlaps the values at time points T1 and T3.

**Example 2** (negative attribution of baseline status) - TR80314|c0\_g1\_i1:

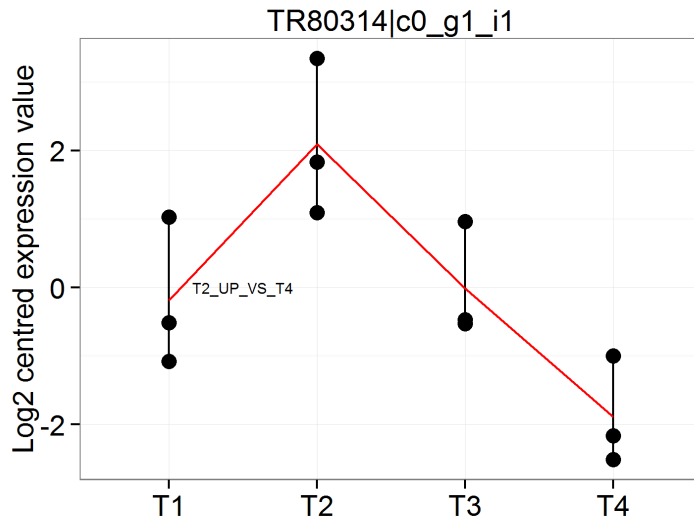

As indicated on this scatterplot, the only two time points that differ statistically are T2 (3 hps) and T4 (96 hps). Similar to the above discussed example, we can see a rise in expression at T2. However, this rise is **not unambiguous**, as the range of data points overlap among time points T1, T2, and T3. T4 has a largely reduced average expression (red line) when compared to the other three time points, but it still overlaps with T1 (which itself overlaps with T2 and T3). Thus, because there is no time point which is clearly differentiated by not overlapping with any other time points, we opted to not declare this transcript as being differentially expressed specifically at one time point as it is unsure if the transcript is being upregulated at T2, downregulated at T4, or both.

The same process of reason depicted in the above two examples was used for all of the 83 transcripts that did not statistically differ when compared to control. The conclusions made for each of these transcripts are noted in the annotation report supplementary file (Supplementary Data 1 [2.annotation\_report]). Scatterplots for the 83 transcripts are presented below.

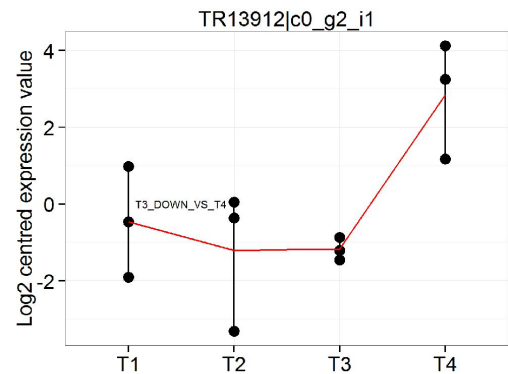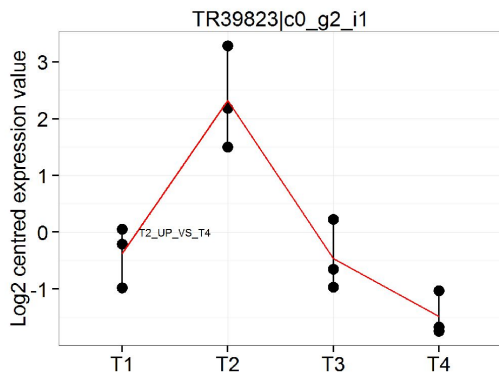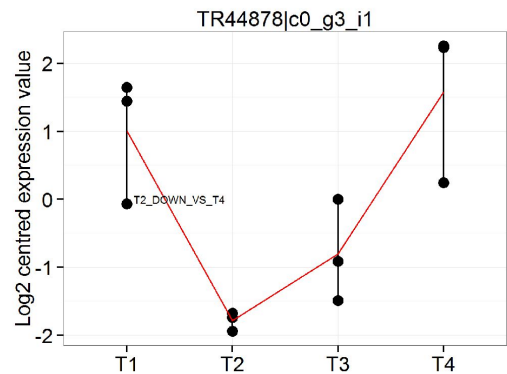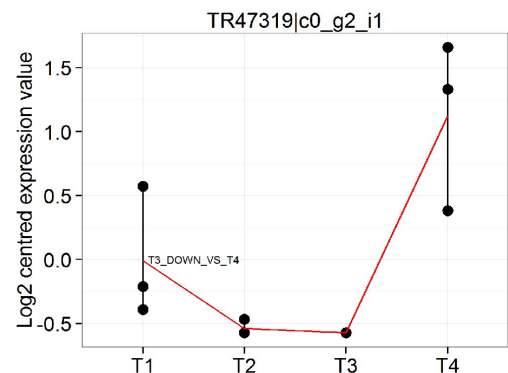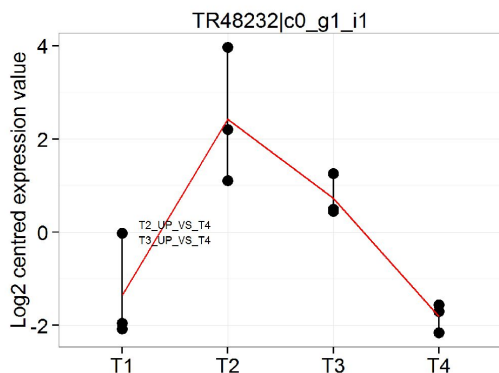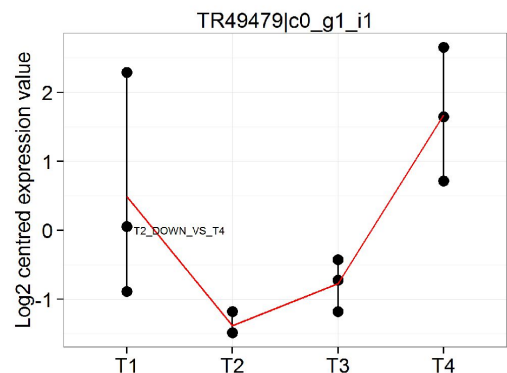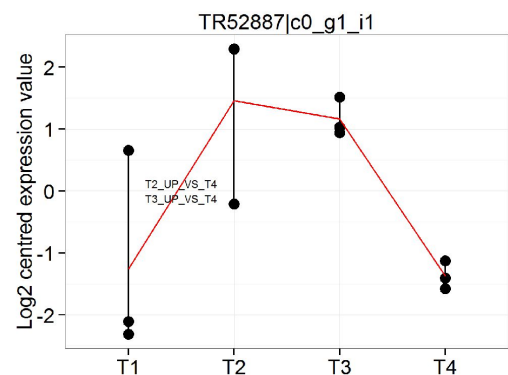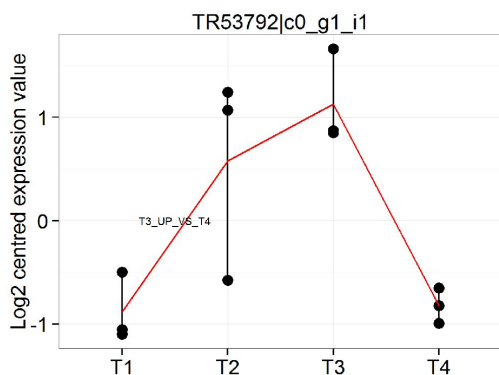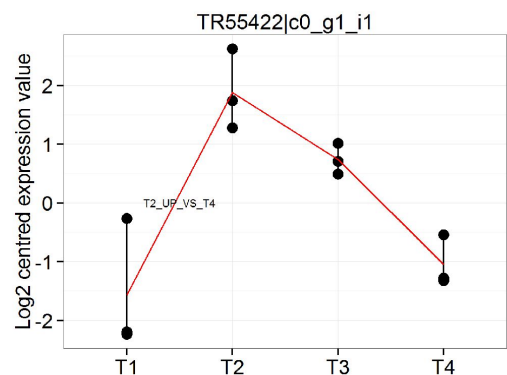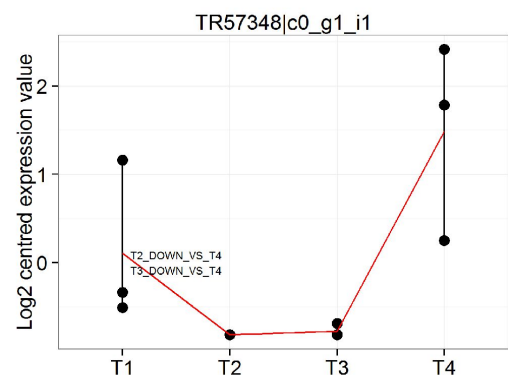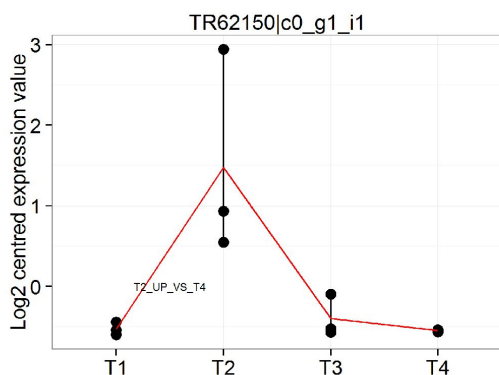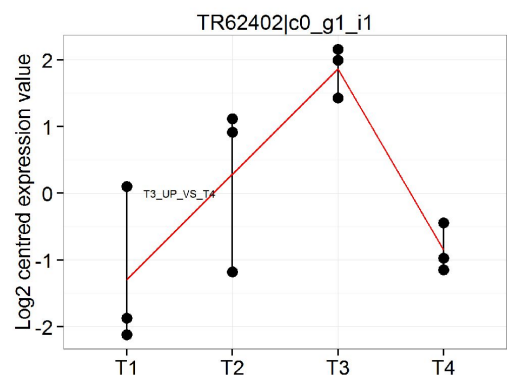



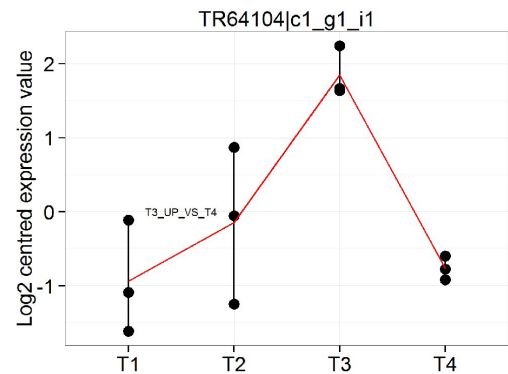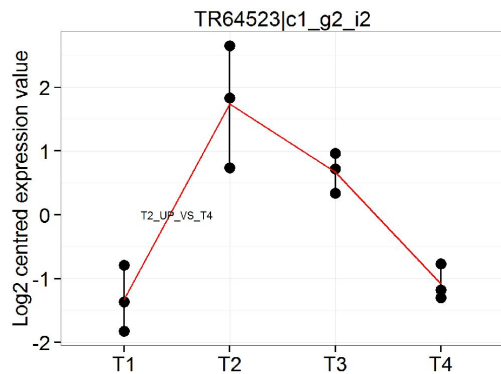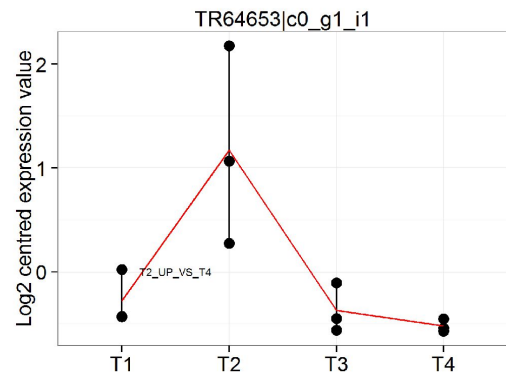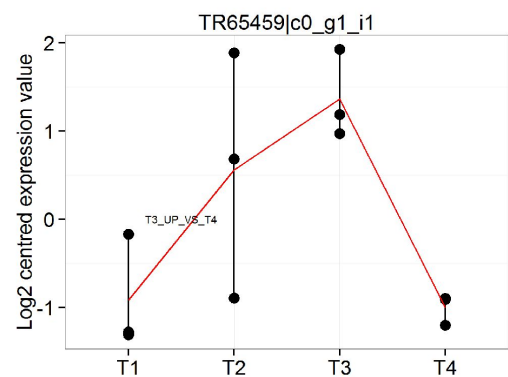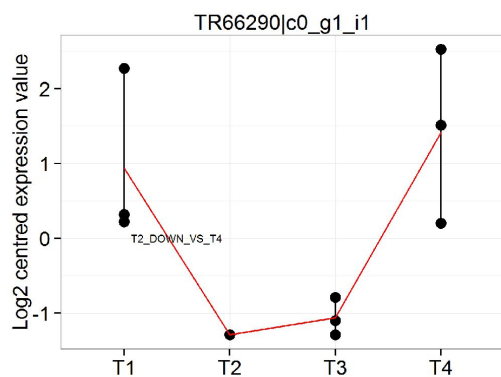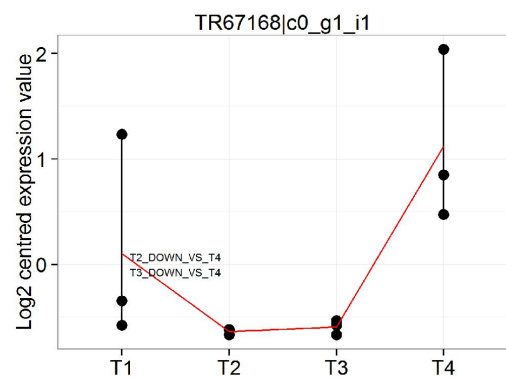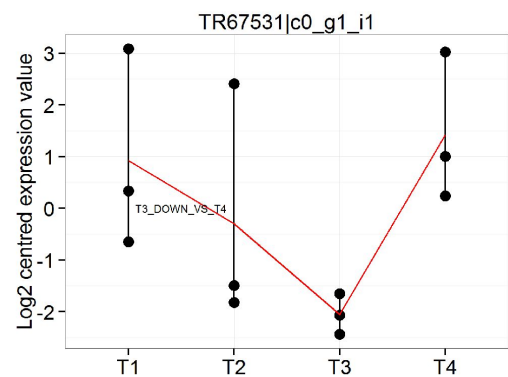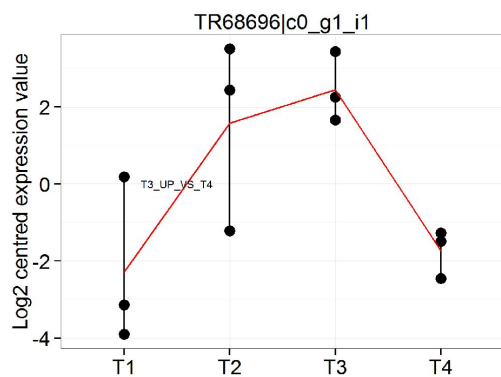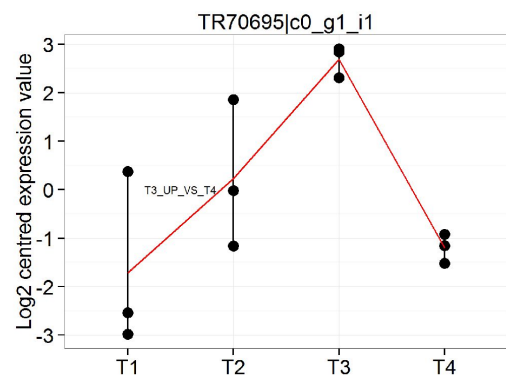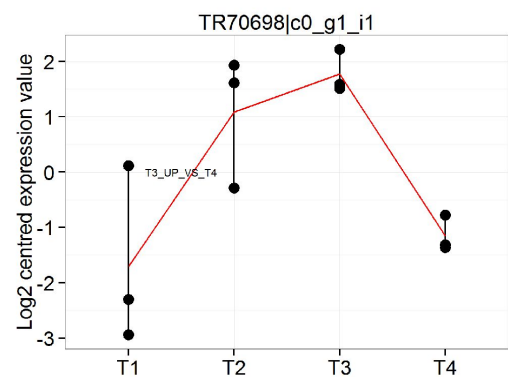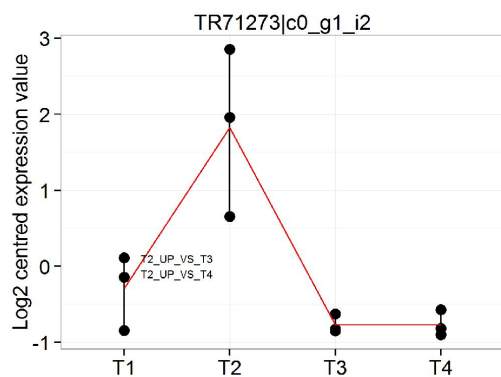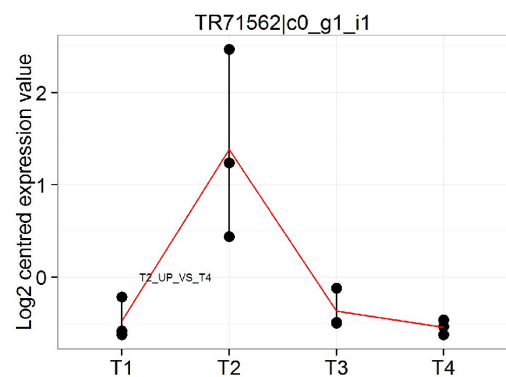

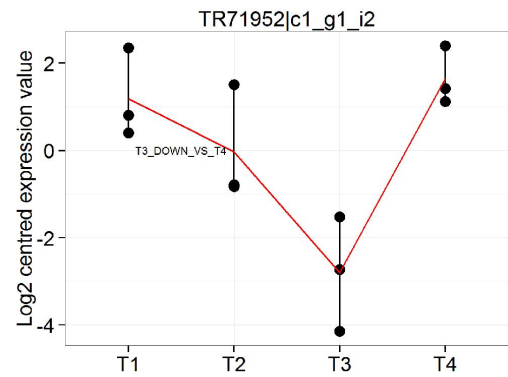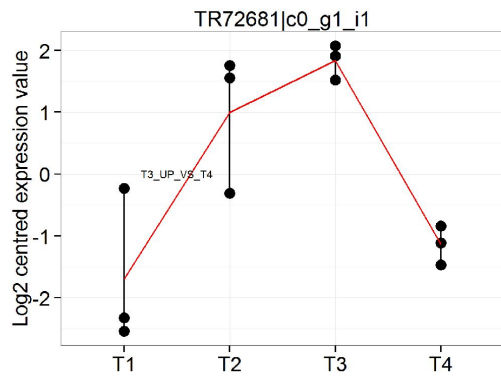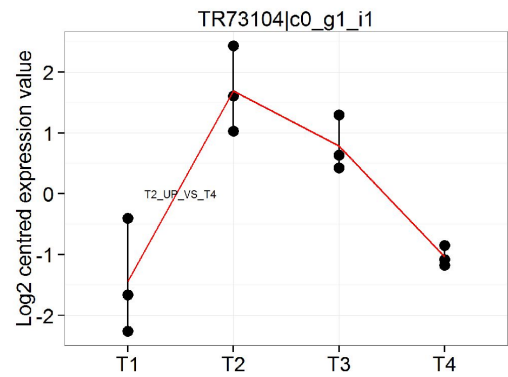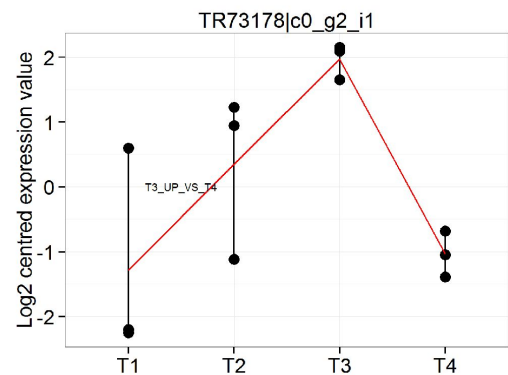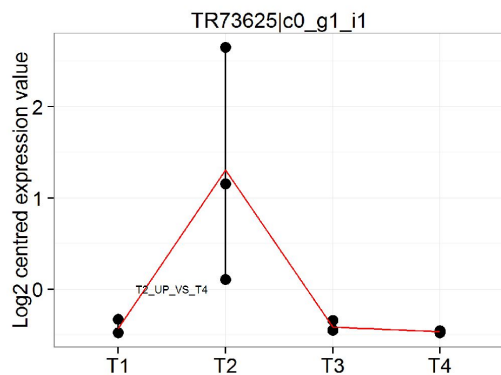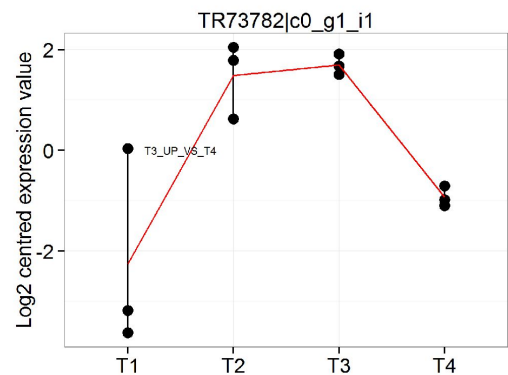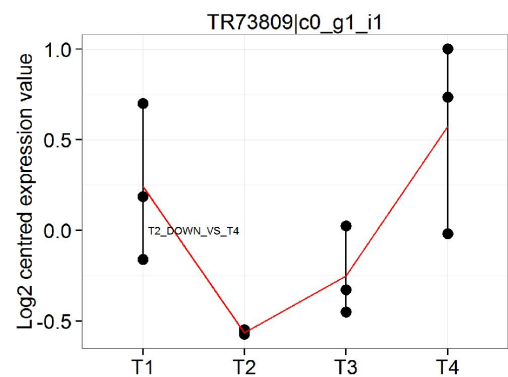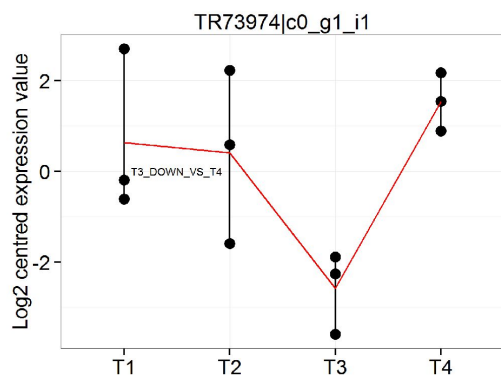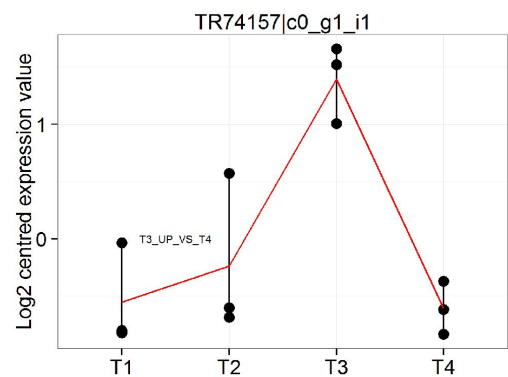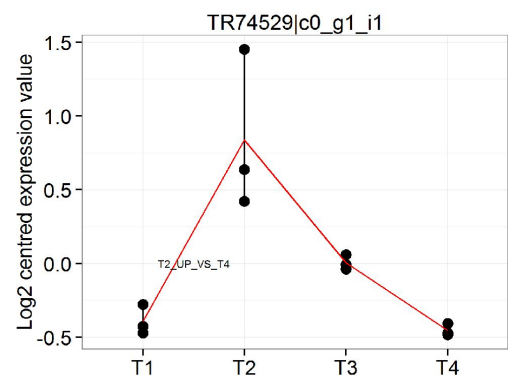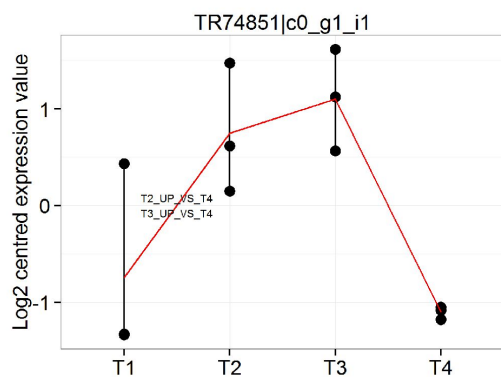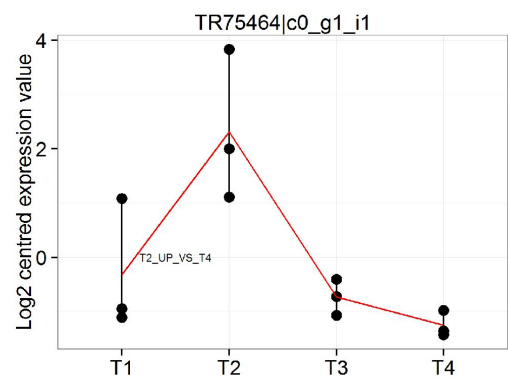

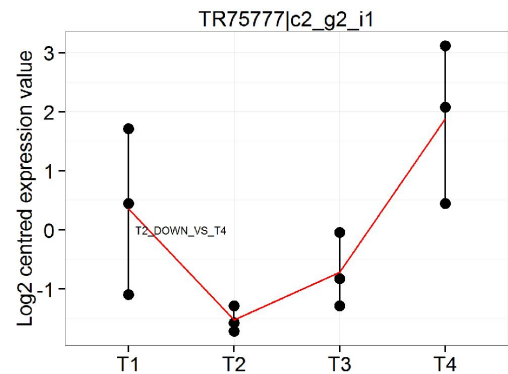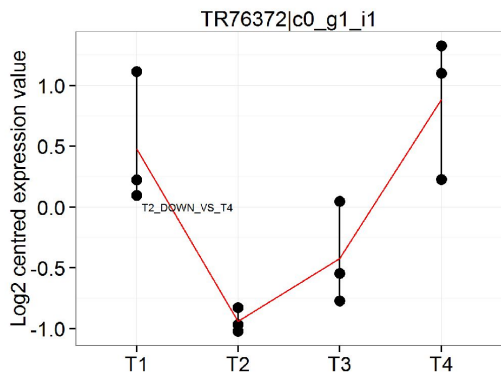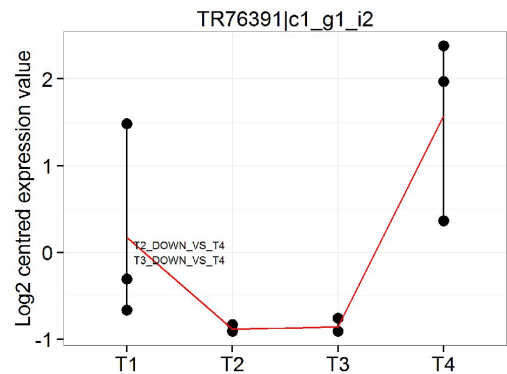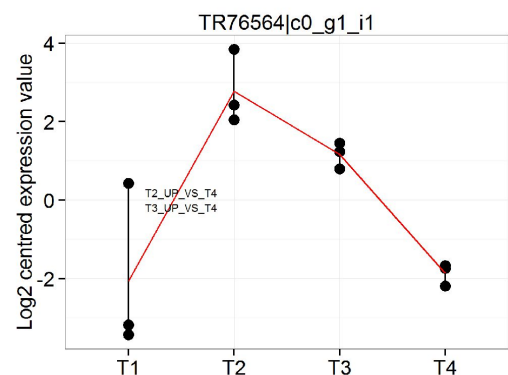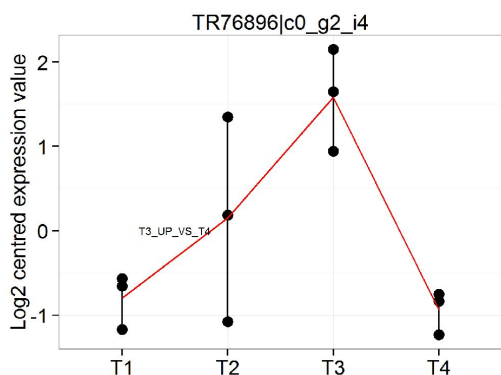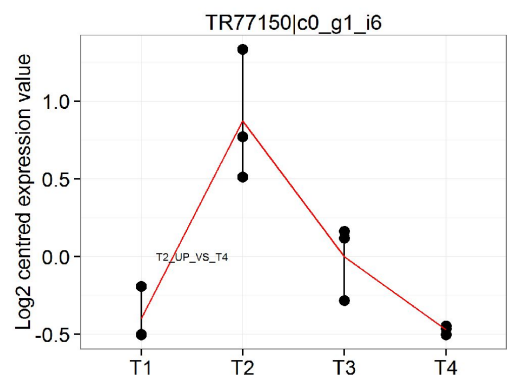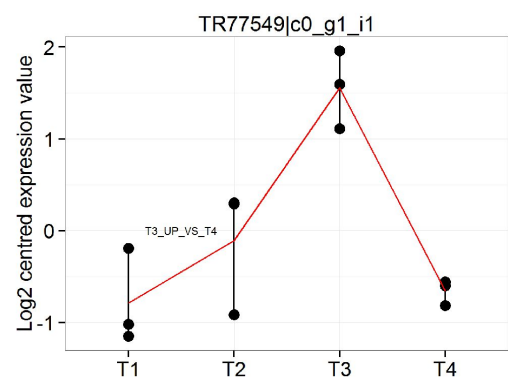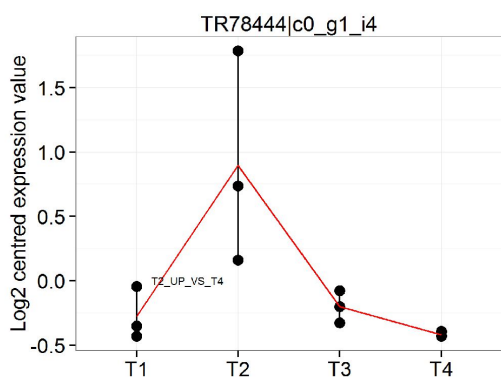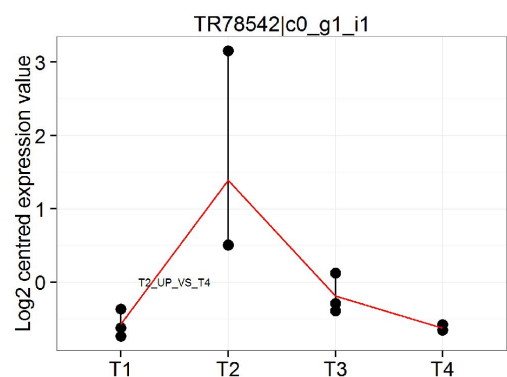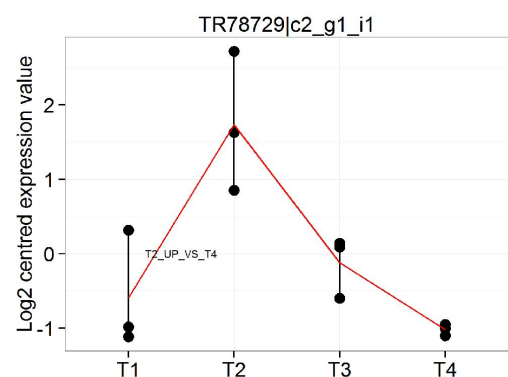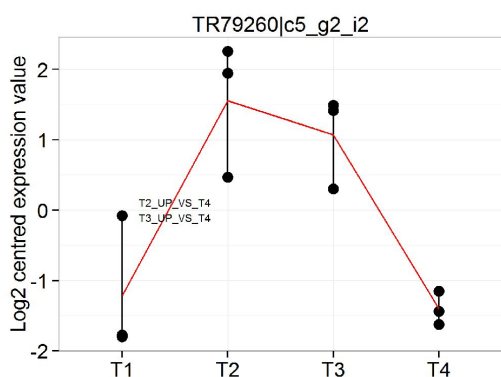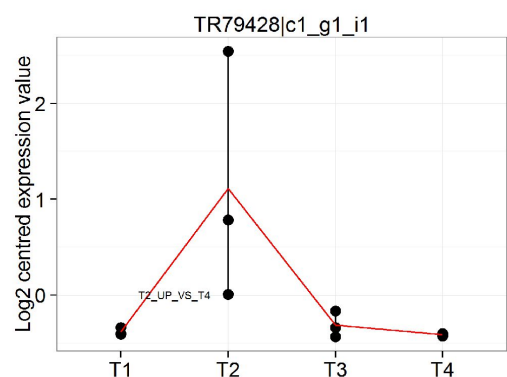

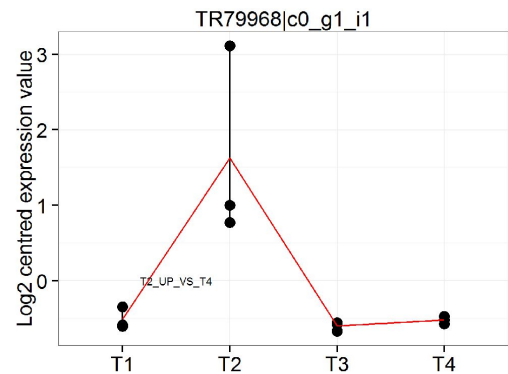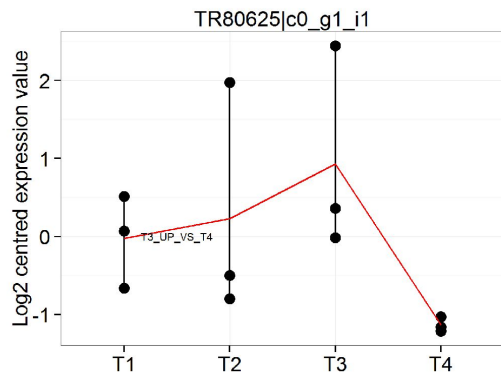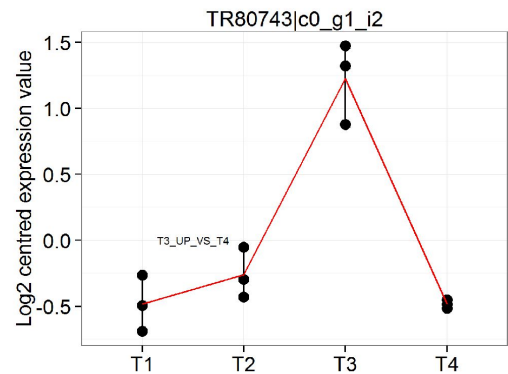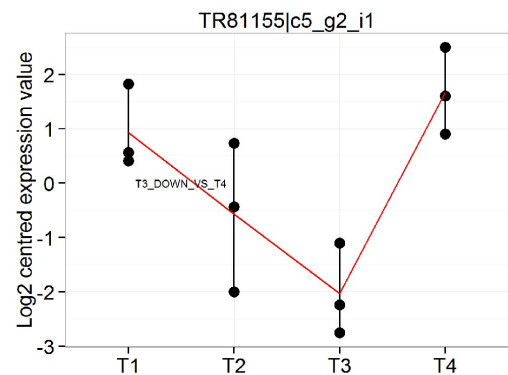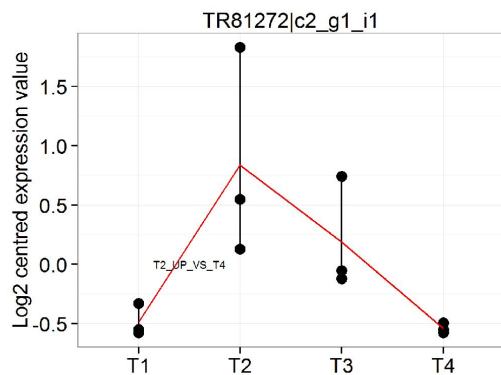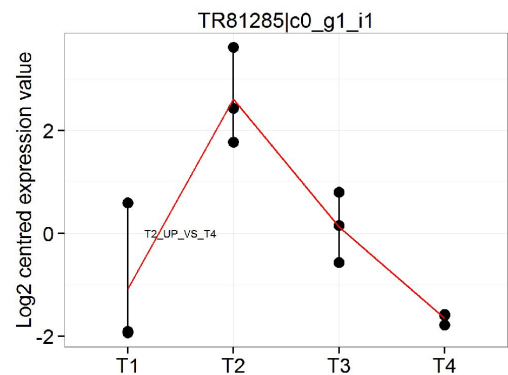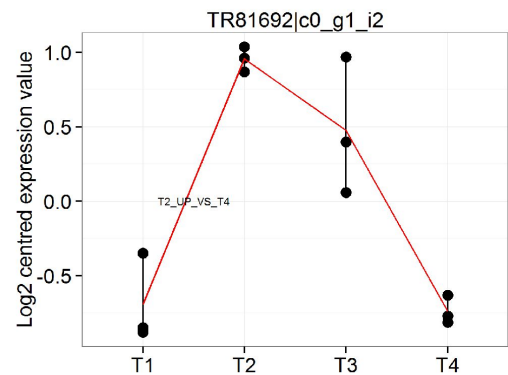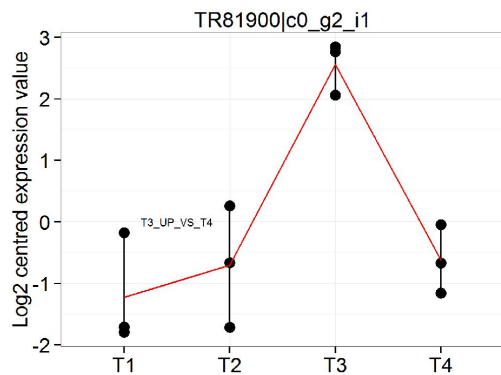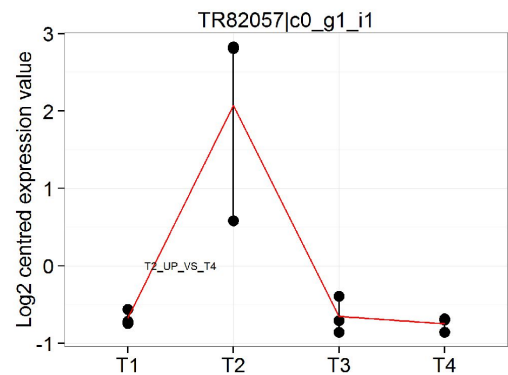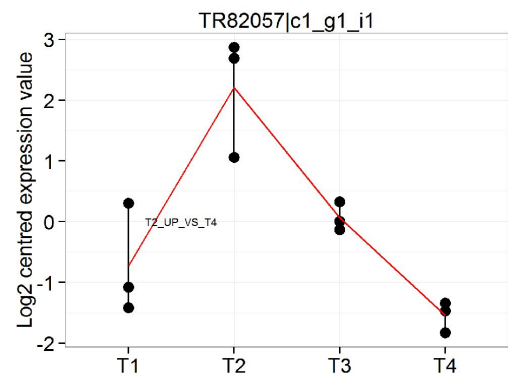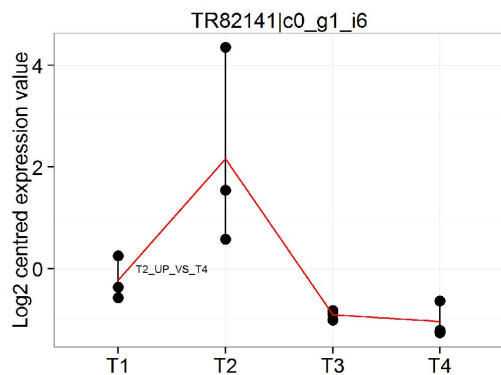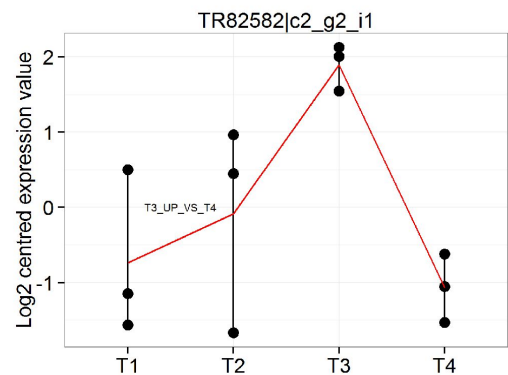

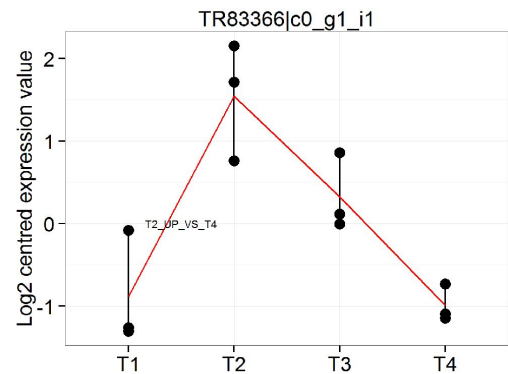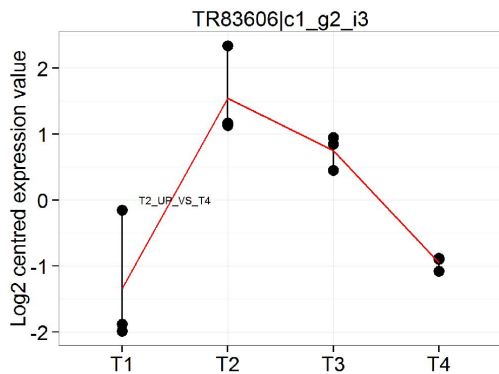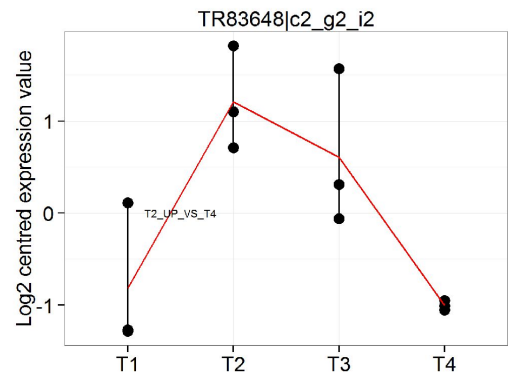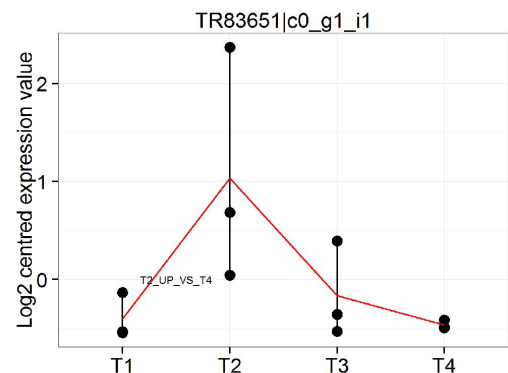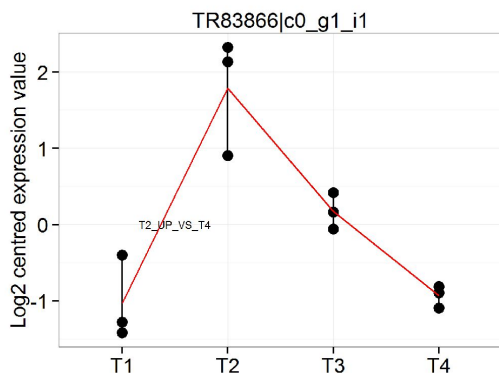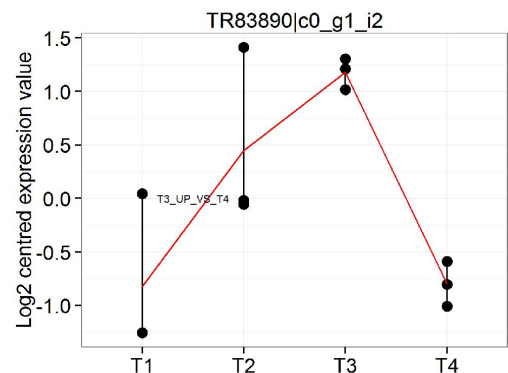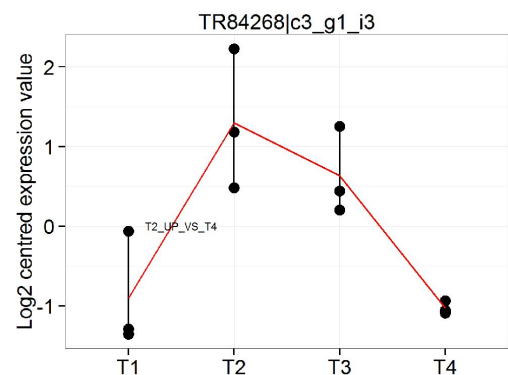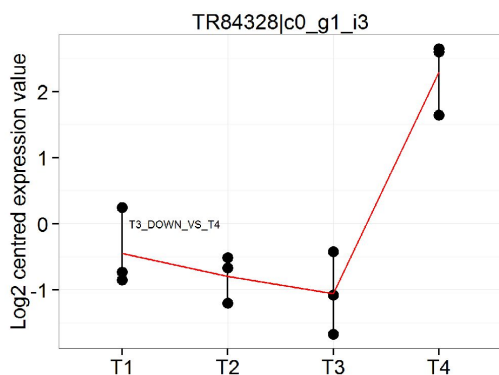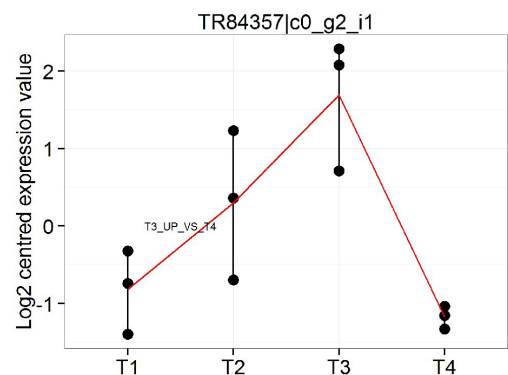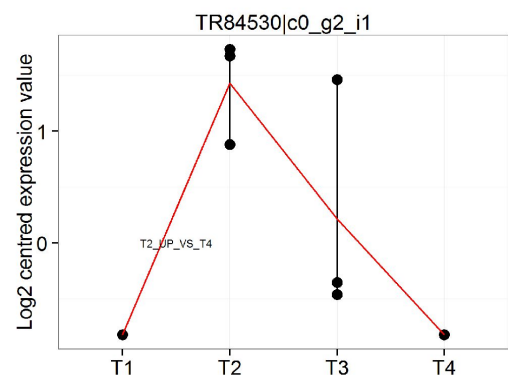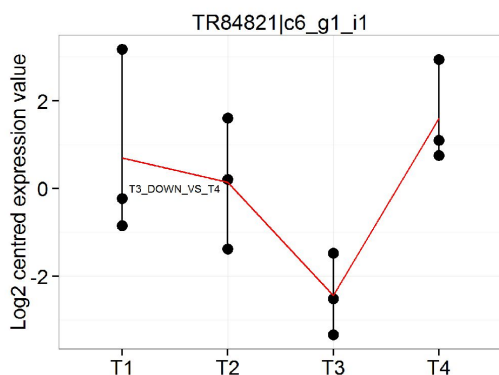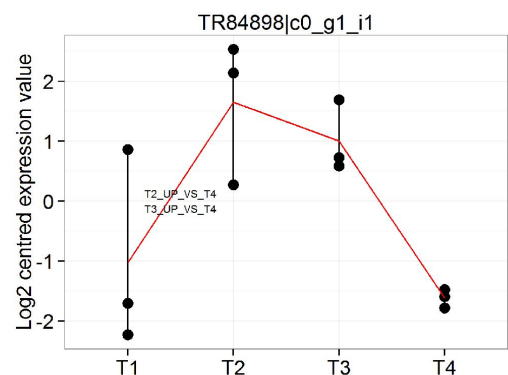

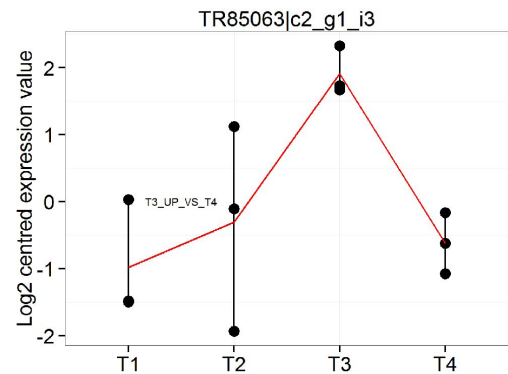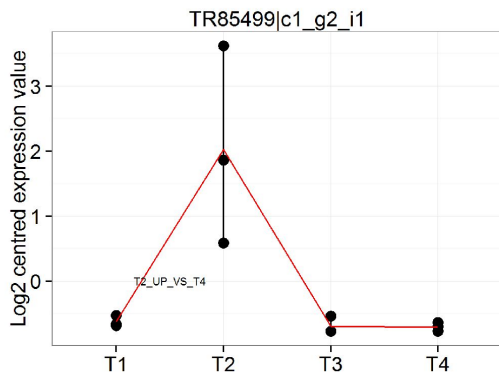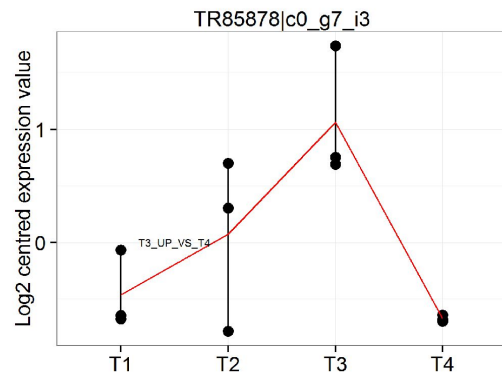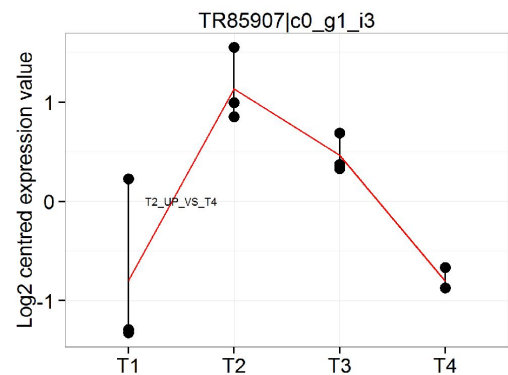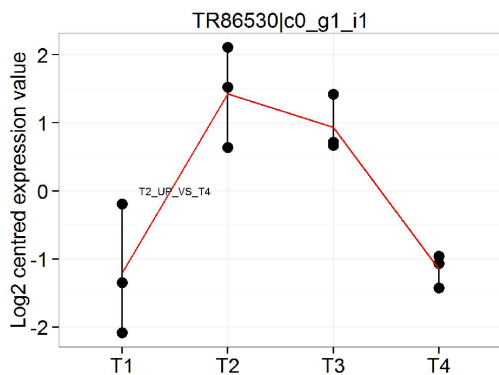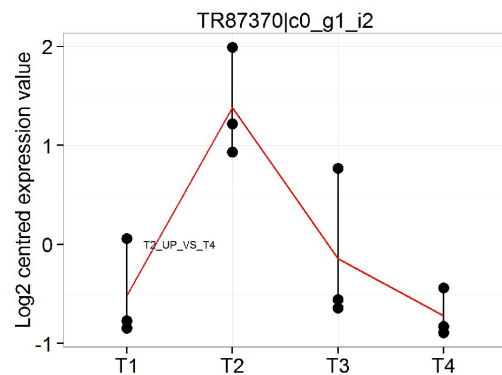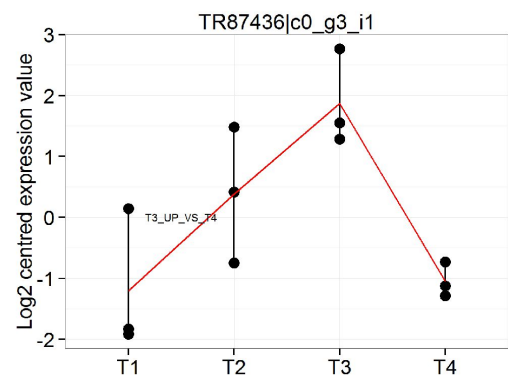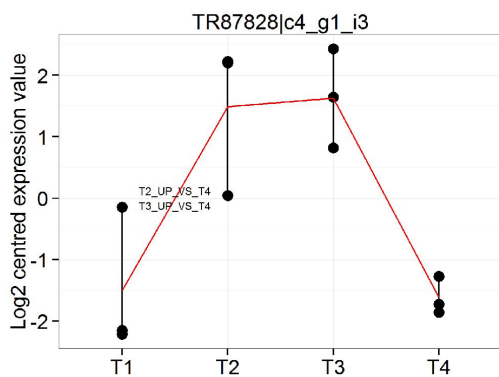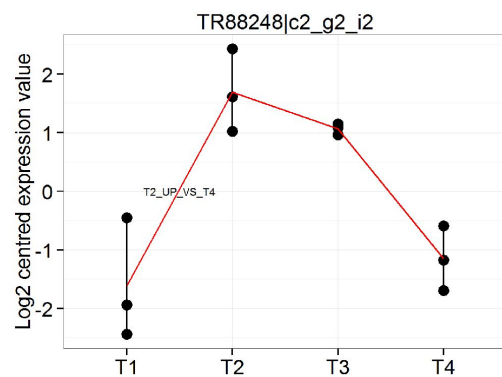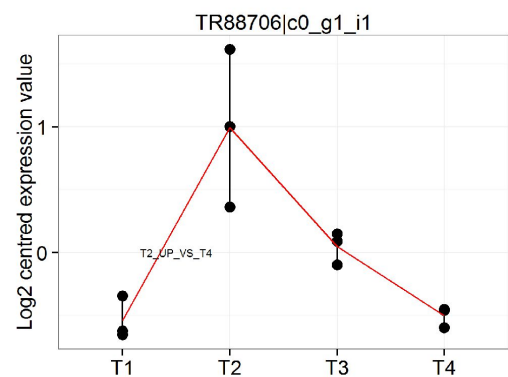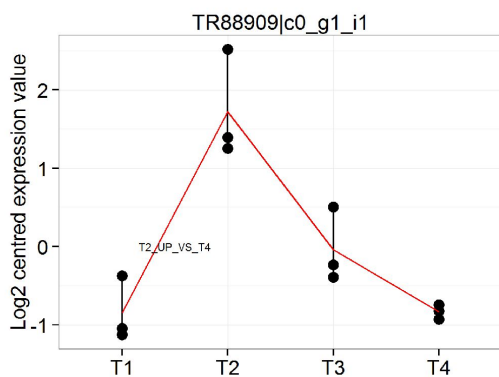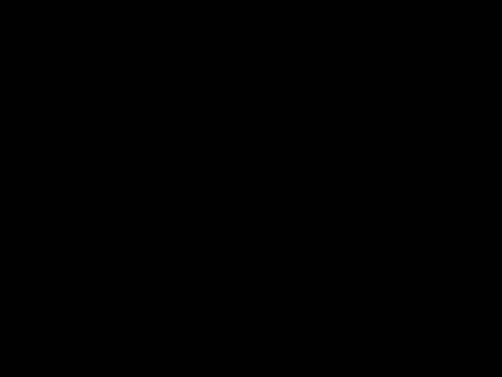

**Supplementary table S1.** General transcriptome assembly information and quality statistics for the five actinarian species used to identify conserved open reading frames (*Nemanthus annamensis*, *Telmatactis sp.*, *Anthopleura buddemeieri*, *Aulactinia veratra*, and *Actinia tenebrosa*) as well as a previous *Calliactis polypus* transcriptome used for comparison of transcript assembly.

| General details                         |                 |                                         |                           |                                     | Trinity stats (all transcript contigs) |       |          |                    |
|-----------------------------------------|-----------------|-----------------------------------------|---------------------------|-------------------------------------|----------------------------------------|-------|----------|--------------------|
| Sample                                  | Sampled tissues | After CD-HIT clustering? (95% identity) | SRA Accession             | BUSCO summarised benchmark          | No. Transcripts                        | %GC   | N50 (bp) | Median contig (bp) |
| <i>Nemanthus annamensis</i>             | All             | Yes                                     | SRR3228732                | C:92%[D:24%], F:4.1%, M:3.6%, n:843 | 88325                                  | 40.49 | 1699     | 427                |
| <i>Telmatactis sp.</i>                  | All             | Yes                                     | SRR3225580                | C:58%[D:12%], F:26%, M:15%, n:843   | 131812                                 | 38.79 | 727      | 318                |
| <i>Anthopleura buddemeieri</i>          | All             | Yes                                     | SRR3205971                | C:82%[D:24%], F:11%, M:6.0%, n:843  | 181029                                 | 40.83 | 861      | 383                |
| <i>Aulactinia veratra</i>               | All             | Yes                                     | SRR3205707,<br>SRR3205708 | C:89%[D:22%], F:5.8%, M:5.1%, n:843 | 144326                                 | 39.73 | 1090     | 388                |
| <i>Actinia tenebrosa</i>                | All             | Yes                                     | SRR3206038                | C:91%[D:18%], F:3.7%, M:4.7%, n:843 | 105145                                 | 39.23 | 1609     | 387                |
| <i>Calliactis polypus</i><br>(previous) | All             | No                                      | SRR3206038                | C:92%[D:37%], F:3.9%, M:3.6%, n:843 | 214675                                 | 37.63 | 1577     | 356                |

**Supplementary table S2.** General transcriptome assembly information and quality statistics for all sampled specimens including the combined reference transcriptome used for differential gene expression analysis of *Calliactis polypus* after injury. Note that sample A1T2 received a poor BUSCO score due to ribosomal contamination.

| General details |                 |                                     | Trinity stats (all transcript contigs) |       |          |                    |
|-----------------|-----------------|-------------------------------------|----------------------------------------|-------|----------|--------------------|
| Sample          | Sampled tissues | BUSCO summarised benchmark          | No. Transcripts                        | %GC   | N50 (bp) | Median contig (bp) |
| A1T1            | All             | C:65%[D:17%], F:21%, M:12%, n:843   | 80850                                  | 38.96 | 1211     | 442                |
| A1T2            | All             | C:26%[D:5.5%], F:27%, M:46%, n:843  | 63675                                  | 39.36 | 919      | 381                |
| A1T3            | All             | C:63%[D:15%], F:23%, M:13%, n:843   | 73017                                  | 39.00 | 1258     | 448                |
| A1T4            | All             | C:83%[D:27%], F:12%, M:4.5%, n:843  | 90571                                  | 38.70 | 1651     | 480                |
| A2T1            | All             | C:74%[D:25%], F:16%, M:8.7%, n:843  | 94353                                  | 38.58 | 1339     | 450                |
| A2T2            | All             | C:55%[D:16%], F:23%, M:20%, n:843   | 73673                                  | 39.16 | 1152     | 428                |
| A2T3            | All             | C:75%[D:25%], F:14%, M:9.4%, n:843  | 99404                                  | 38.67 | 1442     | 441                |
| A2T4            | All             | C:63%[D:19%], F:24%, M:12%, n:843   | 80236                                  | 36.55 | 1227     | 447                |
| A3T1            | All             | C:51%[D:13%], F:27%, M:20%, n:843   | 74069                                  | 39.29 | 958      | 413                |
| A3T2            | All             | C:72%[D:21%], F:17%, M:9.8%, n:843  | 80771                                  | 38.75 | 1523     | 469                |
| A3T3            | All             | C:75%[D:20%], F:15%, M:9.4%, n:843  | 78468                                  | 38.88 | 1538     | 471                |
| A3T4            | All             | C:70%[D:20%], F:18%, M:11%, n:843   | 79694                                  | 38.96 | 1210     | 443                |
| Reference       | All             | C:91%[D:39%], F:4.6%, M:3.6%, n:843 | 252263                                 | 37.93 | 1167     | 385                |



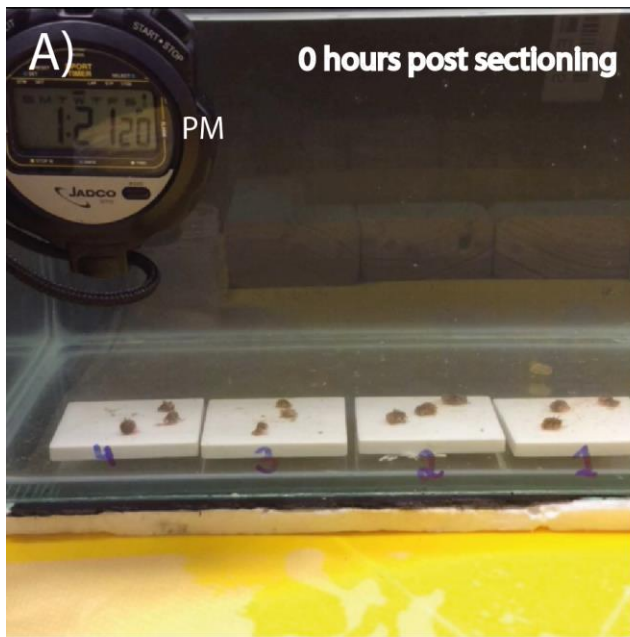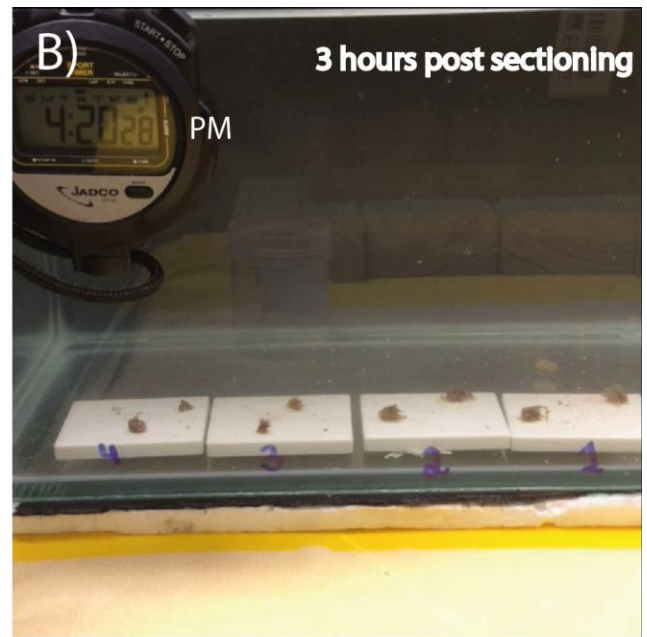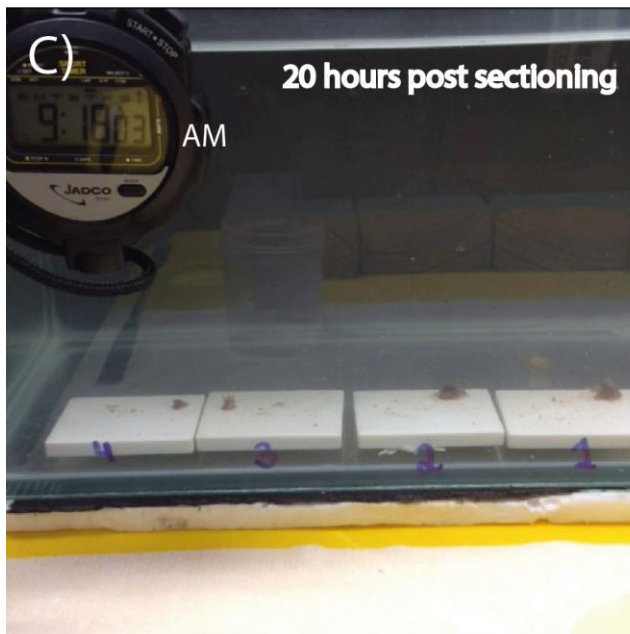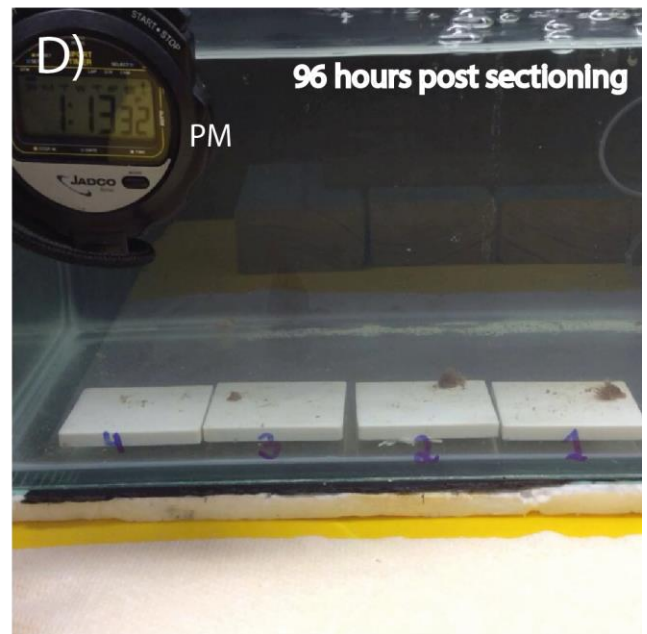

**Supplementary Figure S1.** Images extracted from a time-lapse video recording of *Calliactis polypus* following sectioning for our current study. Stopwatch in top left of each image depicts the time in 12-hour clock notation. Note that a fourth anemone is present in these images, although only three were used for our RNA-Seq analysis. A) Image taken shortly after initial *C. polypus* sectioning. The control (0 hps) anemone fragment was immediately removed and frozen in liquid Nitrogen. B) Image taken shortly after 3 hps sample was removed and frozen in liquid Nitrogen. C) Image taken shortly after 20 hps sample was removed and frozen in liquid Nitrogen. D) Image taken just before the final 96 hps sample

was removed and frozen in liquid Nitrogen. Note that the *C. polypus* fragment on tile '4' is not in frame as it moved off the tile. hps; hours post sectioning.

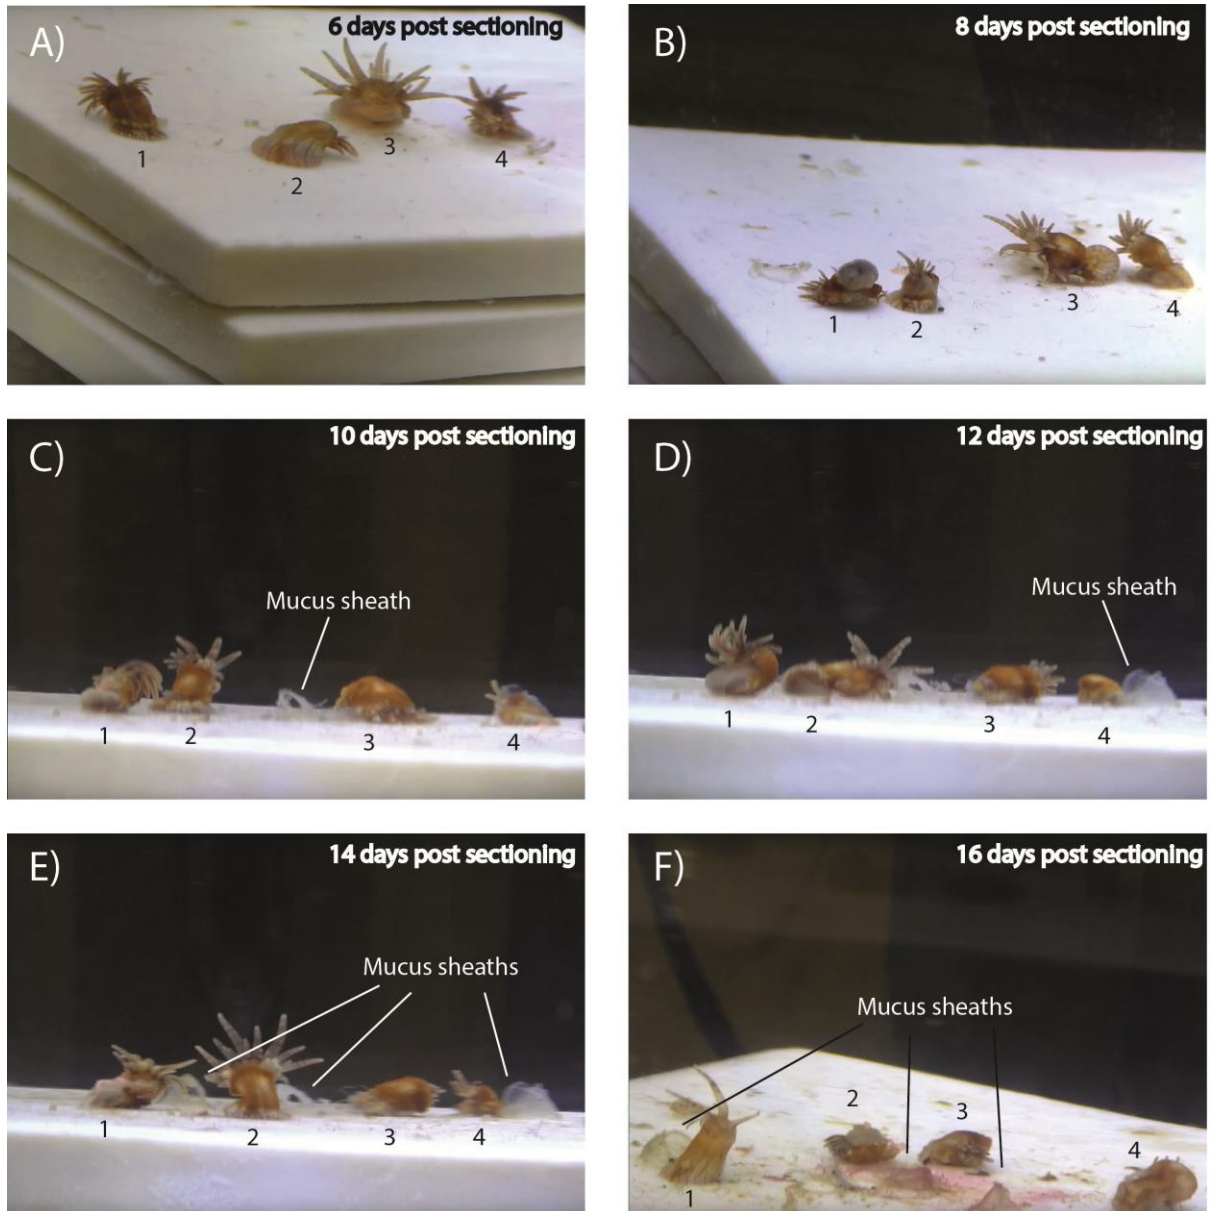

**Supplementary Figure S2.** Images extracted from a time-lapse video recording of *Calliactis polypus* following sectioning in a preliminary investigation of *C. polypus* regeneration (i.e., not from this study). Note that all sea anemone fragments survived beyond the timeframe indicated by these images. A) Image taken 6 dps with individual fragments indicated. No anemone fragments have as yet sutured their body into a radially symmetrical column, indicating that regeneration is still occurring. Fragment labelled '2' demonstrates common

behaviour seen of ‘sheltering’ the opening in its body by flattening itself to the ground. B) Image taken 8 dps with individual fragments indicated. Fragment labelled ‘1’ at this time was highly mobile, using its tentacles to move across the tile. C) Image taken 10 dps with individual fragments indicated. Up until this point all anemones evidenced a thin, solidified layer of mucus covering the area that was sectioned. This mucus “sheath” was produced shortly after wounding. At this time, a mucus sheath can be seen detached from one of the anemone fragments. Additionally, although blurry, pink mesenterial filaments can be seen in the fragment labelled ‘1’ which was seen in other fragments throughout the experiment. D) Image taken 12 dps with individual fragments indicated. A mucus sheath can be seen detached from one of the anemone fragments. Fragment labelled ‘1’ is demonstrating a common behaviour of spasmodic convulsions involving the folding in and flexing out of its body which other fragments occasionally performed. E) Image taken 14 dps with individual fragments indicated. Multiple mucus sheaths can be seen detached from the anemone fragments. F) Image taken 16 dps with individual fragments indicated. Multiple mucus sheaths can be seen detached from the anemone fragments. Fragment labelled ‘1’ has fully sutured its column back into a radially symmetric form, indicating that regeneration may be complete in this fragment. Fragment labelled ‘2’ has still not achieved this, although fragments ‘3’ and ‘4’ have almost sutured their columns back into a radially symmetric form. Pink staining is thought to be the result of pink mesenterial filament decomposition. dps; days post sectioning.
